1

2 **Poly(rC)-binding protein 1 limits hepatitis C virus assembly and egress**

3

4 **Sophie E. Cousineau<sup>1</sup> and Selena M. Sagan<sup>1,2#</sup>**

5 <sup>1</sup>Department of Microbiology & Immunology, McGill University, Montreal, QC, Canada

6 <sup>2</sup>Department of Biochemistry, McGill University, Montreal, QC, Canada

7 #Corresponding Author: Dr. Selena Sagan, McGill University, 3655 Promenade Sir William

8 Osler, Room 805, Montréal, QC, H3G 1Y6; email: [selena.sagan@mcgill.ca](mailto:selena.sagan@mcgill.ca)

9

10 **Keywords:** Hepatitis C virus (HCV), poly(rC)-binding protein 1 (PCBP1), hnRNP E1,

11 assembly, egress

12

13 **Running title:** PCBP1 limits HCV assembly and egress

14

15 **ABSTRACT**

16 The hepatitis C virus (HCV) co-opts a number of cellular elements – including proteins, lipids,  
17 and microRNAs – to complete its viral life cycle. The cellular RNA-binding protein poly(rC)-  
18 binding protein 1 (PCBP1) had previously been reported to bind the HCV genome 5'  
19 untranslated region (UTR), but its importance in the viral life cycle has remained unclear.  
20 Herein, we aimed to clarify the role of PCBP1 in the HCV life cycle. Using the HCV cell culture  
21 (HCVcc) system, we found that endogenous PCBP1 knockdown decreased viral RNA  
22 accumulation yet increased extracellular virus titers. To dissect PCBP1's specific role in the viral  
23 life cycle, we carried out assays for viral entry, translation, genome stability, RNA replication,  
24 virion assembly and egress. We found that PCBP1 did not affect viral entry, translation, RNA  
25 stability, or RNA replication in the absence of efficient virion assembly. To specifically examine  
26 virion assembly and egress, we inhibited viral RNA replication with an RNA-dependent RNA  
27 polymerase inhibitor and tracked both intracellular and extracellular viral titers over time. We  
28 found that when viral RNA accumulation was inhibited, knockdown of PCBP1 still resulted in  
29 an overall increase in HCV particle secretion. We therefore propose a model where endogenous  
30 PCBP1 limits virion assembly and egress, thereby indirectly enhancing viral RNA accumulation  
31 in infected cells. This model furthers our understanding of how cellular RNA-binding proteins  
32 modulate HCV genomic RNA utilization during the viral life cycle.

33

34 **IMPORTANCE**

35 Hepatitis C virus (HCV) is a positive-sense RNA virus, and as such, its genome must be a  
36 template for multiple mutually exclusive steps of the viral life cycle, namely translation, RNA  
37 replication, and virion assembly. However, the mechanism(s) that regulate how the viral genome

38 is used throughout the viral life cycle still remain unclear. A cellular RNA-binding protein –  
39 PCBP1 – had previously been reported to bind the HCV genome, but its precise role in the viral  
40 life cycle was not known. In this study, we found that depleting PCBP1 decreased viral RNA  
41 accumulation but increased virus secretion. We ruled out a role for PCBP1 in virus entry,  
42 translation, genome stability or RNA replication, and demonstrate that PCBP1 knockdown  
43 enhances virus secretion when RNA replication is inhibited. We conclude that PCBP1 normally  
44 prevents virus assembly and egress, which allows more of the viral genomic RNA to be available  
45 for translation and viral RNA replication.

## 46 INTRODUCTION

47 The hepatitis C virus (HCV) is an enveloped virus of the *Flaviviridae* family (genus:  
48 hepacivirus) that typically causes a persistent liver infection (1). Its ~9.6 kb single-stranded,  
49 positive-sense RNA genome contains a single open reading frame flanked by 5' and 3'  
50 untranslated regions (UTR). A highly structured, type 3 internal ribosomal entry site (IRES) in  
51 the 5' UTR drives the translation of the viral polyprotein, which is subsequently processed into  
52 10 mature viral proteins: 3 structural proteins (core, E1 and E2 glycoproteins), and 7  
53 nonstructural (NS) proteins (p7, NS2, NS3, NS4A, NS4B, NS5A and NS5B) (2, 3). While the  
54 structural proteins form the nucleocapsid and viral envelope, the NS3-5B form the viral  
55 replicase, required for viral RNA replication (4). The p7, NS2, NS3 and NS5A proteins have also  
56 been implicated in viral genome packaging and the assembly of new virion particles (5-8). As a  
57 positive-sense RNA virus, the HCV genome itself must serve as a template for viral translation,  
58 genome replication, and packaging; however, the mechanisms that determine which process each  
59 viral RNA is engaged in at any given time have not been defined. Due to their limited coding  
60 capacity, viruses are highly dependent on the molecular machinery of the host cell; thus, it is  
61 likely that cellular components participate in regulation of the viral RNA during the HCV life  
62 cycle. While a number of cellular proteins and RNAs have been shown to interact with the HCV  
63 genome, their precise role(s) in the viral life cycle have yet to be defined.

64 The poly(rC)-binding protein 1 (PCBP1) is one of the three most abundant cellular RNA-  
65 binding proteins with a strong affinity for poly(rC), along with its paralogs hnRNP K and PCBP2  
66 (9). These multifunctional proteins can regulate translation and enhance the stability of their  
67 cellular mRNA targets, which they interact with through their hnRNP K homologous (KH)  
68 domains (10). Notably, all three paralogs have been reported to bind to the HCV 5' UTR (11-

69 13). However, the degree to which each protein has been studied in the context of HCV infection  
70 varies significantly – while hnRNP K and PCBP2 have been fairly extensively studied and  
71 reported to play markedly different roles in the viral life cycle, the role of PCBP1 in the HCV  
72 life cycle has not been investigated in detail (14, 15). Beyond its interactions with the 5' UTR,  
73 previous reports suggested that PCBP1 was not necessary for HCV IRES-mediated translation,  
74 but that knockdown of PCBP1 decreases HCV RNA accumulation during infection (16, 17).

75         Herein, we sought to clarify the role of PCBP1 in the HCV life cycle. Using a cell  
76 culture-adapted strain of HCV, we found that PCBP1 knockdown decreased viral RNA  
77 accumulation, yet led to an increase in virus secretion. By examining individual steps of the viral  
78 life cycle, we ruled out a role for PCBP1 in viral entry, translation, genome stability and viral  
79 RNA replication. Further analysis of the assembly step revealed that, similarly to its paralog  
80 hnRNP K, endogenous PCBP1 limits HCV virion assembly and release.

81

## 82 **MATERIALS AND METHODS**

### 83 **Cell culture**

84 Huh-7.5 human hepatoma cells were obtained from Charlie Rice (Rockefeller University) and  
85 maintained in complete media: Dulbecco's Modified Eagle Media (DMEM) supplemented with  
86 inactivated 10% fetal bovine serum (FBS), 2 mM L-glutamine, and 1X MEM non-essential  
87 amino acids. Human embryonic kidney (293T) cells were kindly provided by Martin J. Richer  
88 (McGill University, Montreal, QC, Canada) and were maintained in DMEM supplemented with  
89 10% FBS. All cell lines were maintained at 37°C/5% CO<sub>2</sub> and were routinely screened for  
90 mycoplasma contamination.

91

## 92 **Plasmids and viral RNAs**

93 The pJFH-1<sub>T</sub> plasmid, encoding a cell culture-adapted Japanese Fulminant Hepatitis (JFH-1;  
94 HCV genotype 2a) with three adaptive mutations that increase viral titers in cell culture, was a  
95 gift from Rodney Russell (Memorial University of Newfoundland) (18). Plasmids pJ6/JFH1 FL  
96 RLuc WT ("RLuc-wt") and pJ6/JFH-1 FL RLuc GNN ("RLuc-GNN") bear full-length viral  
97 sequence derived from the J6 (structural genes) and JFH-1 (NS genes) isolates of HCV, with a  
98 *Renilla* luciferase (RLuc) reporter (5). The pJ6/JFH-1 mono RLuc-NS2 plasmid ("Δcore-p7") – a  
99 truncated version of the *Renilla* reporter virus with a deletion of the structural genes through p7 –  
100 was a gift from Joyce Wilson (University of Saskatchewan) (19). The pJ6/JFH-1 FL RLuc-  
101 NS5A-GFP ("NS5A-GFP") was created via overlapping PCR and subcloned using the *AvrII* and  
102 *XbaI* restriction sites, as previously described (20).

103 To make full-length uncapped viral RNAs, all plasmid templates were linearized and *in*  
104 *vitro* transcribed as previously described (21). The firefly luciferase (FLuc) mRNA was transcribed  
105 from the Luciferase T7 Control DNA plasmid (Promega) linearized using *XmnI* and *in vitro*  
106 transcribed using the mMessage mMachinE T7 Kit (Life Technologies) according to the  
107 manufacturer's instructions.

108

## 109 **Generation of infectious HCV stocks**

110 To generate viral stocks, 30 μg of *in vitro* transcribed JFH-1<sub>T</sub> RNA was transfected into Huh-7.5  
111 cells using the DMRIE-C reagent (Life Technologies) according to the manufacturer's  
112 instructions. Four days post-transfection, infectious cell supernatants were passed through a 0.45  
113 μm filter and infectious viral titers were determined by focus-forming unit assay (18). Infectious

114 virus was amplified for two passages through Huh-7.5 cells at a MOI of 0.1. Viral stocks were  
115 aliquoted and stored at -80°C until use.

116

### 117 **Focus-forming unit (FFU) assays**

118 One day prior to infection, 8-well chamber slides (Lab-Tek) were seeded with  $4 \times 10^5$  Huh-7.5  
119 cells/well. Infections were performed with 10-fold serial dilutions of viral samples in 100  $\mu$ L for  
120 4 h, after which the supernatant was replaced with fresh media. Three days post-infection, slides  
121 were fixed in 100% acetone and stained with anti-HCV core antibody (1:100, clone B2,  
122 Anogen), and subsequently with the AlexaFluor-488-conjugated anti-mouse antibody (1:200,  
123 ThermoFisher Scientific) for immunofluorescence analysis. Viral titers are expressed as the  
124 number of focus-forming units (FFU) per mL.

125 Extracellular virus titers were determined directly from cell supernatants, while  
126 intracellular virus titers were determined after cell pellets were subjected to lysis via four freeze-  
127 thaw cycles, removal of cellular debris via centrifugation, and recovery of virus-containing  
128 supernatants.

129

### 130 **MicroRNAs and siRNA sequences**

131 siGL3 (siCTRL): 5'-CUUACGCUGAGUACUUCGAUU-3', siGL3\* : 5'-  
132 UCGAAGUACUCAGCGUAAGUU-3', miR122<sub>p2-8</sub> (siCTRL for luciferase experiments): 5'-  
133 UAAUCACAGACAAUGGUGUUUGU-3', miR122<sub>p2-8</sub>\*: 5'-  
134 AAACGCCAUUAUCUGUGAGGAUA-3' (22), siPCBP1: 5'-  
135 CUGUGUAAUUUCUGGUCAGUU-3', siPCBP1\*: 5'-CUGACCAGAAAUUACACAGUU-3'  
136 (17) were all synthesized by Integrated DNA Technologies.

137 All microRNA and siRNA duplexes were diluted to a final concentration of 20  $\mu$ M in  
138 RNA annealing buffer (150 mM HEPES pH 7.4, 500 mM potassium acetate, 10 mM magnesium  
139 acetate), and annealed at 37°C for 1 h and stored at -20°C. For all knockdown experiments, 50  
140 nM siRNA transfections were conducted 2 days prior to infection or electroporation of viral  
141 RNAs. Transfections were conducted using the Lipofectamine RNAiMAX (Invitrogen)  
142 according to the manufacturer's instructions with the modification that 20  $\mu$ L of reagent were  
143 used to transfect a 10-cm dish of cells.

144

#### 145 **HCV and VSV pseudoparticles (HCVpp and VSVpp)**

146 HCVpp consisting of a FLuc reporter lentiviral vector pseudotyped with the HCV E1 and E2  
147 glycoprotein (from the H77, a genotype 1a strain) were a kind gift from John Law (University of  
148 Alberta) (23). To generate lentiviral vectors pseudotyped with the VSV-G glycoprotein  
149 (VSVpp), a 90% confluent 10-cm dish of 293T cells were transfected with 10  $\mu$ g pPRIME-FLuc,  
150 5  $\mu$ g psPAX.2, and 2.5  $\mu$ g pVSV-G plasmid with 10  $\mu$ L Lipofectamine 2000 (Invitrogen) diluted  
151 in 4 mL Opti-MEM. Media was changed 4, 20, and 28 h post-transfection. At 48 h post-  
152 transfection, the cell culture media was passed through a 0.45  $\mu$ m filter and stored at -80°C.

153 To assay for cell entry, HCVpp and VSVpp were diluted 1/3 in dilution media (1X  
154 DMEM, 3% FBS, 100 IU penicillin and 100  $\mu$ g/mL streptomycin) with 20 mM HEPES and 4  
155  $\mu$ g/ $\mu$ L polybrene, and then introduced to Huh-7.5 cells by spinoculation at 1,200 rpm for 1 h at  
156 room temperature. The cells were left to recover at 37°C for at least 5 h before the  
157 pseudoparticle-containing media was changed for fresh complete Huh-7.5 media. In parallel,  
158 cells seeded in a 6-well plate were transfected with 1  $\mu$ g of pPRIME-FLuc plasmid using  
159 Lipofectamine 2000 (Invitrogen) according to the manufacturer's instructions. Three days post-



160 spinoculation and transfection, cells were lysed in passive lysis buffer (Promega) and FLuc  
161 activity was assayed using the Dual Reporter Luciferase kit (Promega).

162

### 163 **Electroporations**

164 For each electroporation, 400  $\mu$ L of resuspended cells ( $1.5 \times 10^7$  cell/mL) were mixed with 2  $\mu$ g  
165 of FLuc mRNA and 5  $\mu$ g of replicating (WT,  $\Delta$ core-p7 or NS5A-GFP J6/JFH-1 RNA) or 10  $\mu$ g  
166 GNN J6/JFH-1 RNA, and electroporated in 4-mm cuvettes at 270 V, 950  $\mu$ F, and infinite  
167 resistance, optimized for the Bio-Rad GenePulser XCell (Bio-Rad). Electroporated cells were  
168 resuspended in complete Huh-7.5 media and transferred to 6-well plates for luciferase assays and  
169 protein analysis.

170

### 171 **Inhibition of RNA replication by 2'CMA**

172 Two days post-siRNA transfection, Huh-7.5 cells were infected with JFH-1<sub>T</sub> at a MOI of 0.05.  
173 Four to five hours post-infection, each plate of infected cells was split into 6-well plates. Three  
174 days post-infection, the media on these cells was changed for complete Huh-7.5 media with 5  
175  $\mu$ M 2'CMA (2'C-methyladenosine, Carbosynth), an HCV NS5B polymerase inhibitor, or DMSO  
176 control (24). Total RNA and intracellular virus samples were collected at 0, 6 and 12 h post-  
177 treatment, while cell culture supernatants were collected 6 and 12 h post-treatment. Protein  
178 samples were collected from untreated plates to assess PCBP1 knockdown efficiency by Western  
179 blot.

180

181 **Western blot analysis**

182 To collect total intracellular protein samples, cells were lysed in RIPA buffer (150 mM sodium  
183 chloride, 1% NP-40, 0.5% sodium deoxycholate, 0.1% SDS, 50 mM Tris pH 8.0, Complete  
184 Protease Inhibitor Cocktail (Roche)) and frozen at -80°C. Cellular debris was pelleted by  
185 centrifugation at 16,000 x g for 30 min at 4°C, and the supernatant was quantified by BCA  
186 Protein Assay (ThermoScientific). Ten micrograms of sample were loaded onto 10-12% SDS-  
187 PAGE gels. Samples were transferred onto Immobilon-P PVDF membranes (Millipore), blocked  
188 in 5% milk, and incubated overnight with primary antibodies diluted in 5% BSA: rabbit anti-  
189 PCBP1 (clone EPR11055, Abcam ab168378, 1:10,000); rabbit anti-actin (A2066, Sigma,  
190 1:20,000); mouse anti-HCV core (clone B2, Anogen MO-I40015B, diluted 1:7,500); mouse anti-  
191 JFH-1 NS5A (clone 7B5, BioFront Technologies, 1:10,000). Blots were incubated for 1 hour  
192 with HRP-conjugated secondary antibodies diluted in 5% skim milk: anti-mouse (HAF007, R&D  
193 Systems, 1:25,000); anti-rabbit (111-035-144, Jackson ImmunoResearch Laboratories, 1:50,000)  
194 and visualized using enhanced chemiluminescence (ECL Prime Western Blotting Detection  
195 Reagent, Fisher Scientific).

196

197 **RNA isolation and Northern blot analysis**

198 Total RNA was harvested using TRIzol Reagent (ThermoFisher Scientific) according to the  
199 manufacturer's instructions. Ten micrograms of total RNA were separated on a 1% agarose gel  
200 containing 1X 3-(N-morpholino)propanesulfonic acid (MOPS) buffer and 2.2 M formaldehyde  
201 and transferred to a Zeta-probe membrane (Bio-Rad) by capillary transfer in 20X SSC buffer (3  
202 M NaCl, 0.3 M sodium citrate). Membranes were hybridized in ExpressHyb Hybridization  
203 Buffer (ClonTech) to random-primed <sup>32</sup>P-labeled DNA probes (RadPrime DNA labelling

204 system, Life Technologies) complementary to HCV (nt 84-374) and  $\gamma$ -actin (nt 685-1171).

205 Autoradiograph band densities were quantified using Fiji (25).

206

### 207 **RT-qPCR analysis**

208 The iTaq Universal Probes One-Step kit (Bio-Rad) was used to perform duplex assays probing

209 for the HCV genome (NS5B-FW primer: 5'-AGACACTCCCCTATCAATTCATGGC-3';

210 NS5B-RV primer: 5'-GCGTCAAGCCCGTGTAACC-3'; NS5B-FAM probe: 5'-

211 ATGGGTTCGCATGGTCCTAATGACACAC-3') and the GAPDH loading control (PrimePCR

212 Probe assay with HEX probe, Bio-Rad). Each 20  $\mu$ L reaction contained 500 ng of total RNA, 1.5

213  $\mu$ L of the HCV primers and probe, and 0.5  $\mu$ L of the GAPDH primers and probe. RT-PCR

214 reactions were conducted in a CFX96 Touch Deep Well Real-Time PCR system (Bio-Rad).

215 Genome copies were calculated using a standard curve and fold-differences in gene expression

216 were calculated using the  $2^{-\Delta\Delta C_t}$  method (26).

217

### 218 **Luciferase assays**

219 For translation and replication assays, cells were washed in PBS and harvested in 100  $\mu$ L of 1X

220 passive lysis buffer (Promega). The Dual-Luciferase Assay Reporter Kit (Promega) was used to

221 measure both *Renilla* and firefly luciferase activity according to the manufacturer's instructions

222 with the modification that 25  $\mu$ L of reagent were used with 10  $\mu$ L of sample. All samples were

223 measured in triplicate.

224

## 225 **Data analysis**

226 Statistical analyses were performed using GraphPad Prism v9 (GraphPad, USA). Statistical  
227 significance was determined by paired t-test to compare results obtained from multiple  
228 experiments, and by two-way ANOVA with Geisser-Greenhouse and Bonferroni corrections  
229 when more than two comparisons were applied at once. To calculate half-lives, a one-step decay  
230 curve using the least-squares regression was used, and error was reported as the asymmetrical  
231 (profile likelihood) 95% confidence interval of the half-life. To calculate virus accumulation and  
232 virus secretion rates, a simple linear regression was performed using the least squares regression  
233 method. The slope and standard error calculated for each regression represents the rate of virus  
234 accumulation or secretion.

235

## 236 **RESULTS**

### 237 **PCBP1 plays a role in the HCV life cycle**

238 The PCBP1 protein was previously reported to directly interact with the 5' UTR of the HCV  
239 genome, and in an siRNA screen PCBP1 knockdown resulted in a reduction in HCV RNA  
240 accumulation (11, 17). Thus, we sought to further characterize the role of PCBP1 in the HCV life  
241 cycle. We began by assessing how PCBP1 knockdown affected the accumulation of cell culture-  
242 derived HCV (HCVcc), using the cell-culture adapted JFH-1<sub>T</sub> strain. Compared to the parental  
243 JFH-1 strain, JFH-1<sub>T</sub> has three adaptive mutations in the E2, p7 and NS2 coding-region, which  
244 enable it to produce higher viral titers in cell culture (18). We found that knockdown of  
245 endogenous PCBP1 resulted in an approximately 2.2-fold decrease in viral protein and RNA  
246 accumulation in Huh-7.5 cells (**Figure 1A-C and Supplementary Figure 1**). Interestingly,  
247 when we quantified intracellular and extracellular virions, we found that while intracellular titers

248 were not significantly different between the PCBP1 knockdown and control conditions,  
249 extracellular titers were elevated, with an average increase of approximately 3.90-fold in the  
250 PCBP1 knockdown condition (**Figure D-E**). Thus, in line with previous findings, we found that  
251 PCBP1 knockdown decreased viral protein expression and intracellular viral RNA accumulation.  
252 Yet, despite this overall decrease, we observed an increase in extracellular (secreted) virus titers.  
253 These results imply that endogenous PCBP1 indeed plays a role in the HCV life cycle, although  
254 the precise step(s) influenced by PCBP1 remain unclear.

255

#### 256 **PCBP1 knockdown has no impact on HCV entry**

257 Firstly, we explored whether PCBP1 knockdown had any effect on virus entry. To this end, we  
258 made use of the HCV pseudoparticle (HCVpp) system, which consists of lentiviral vectors with a  
259 firefly luciferase reporter gene pseudotyped with the HCV E1 and E2 glycoproteins (23). HCVpp  
260 enter cells by clathrin-mediated endocytosis after engaging with HCV-specific entry receptors;  
261 thus, to account for any changes in clathrin-mediated endocytosis, we used a vesicular stomatitis  
262 virus (VSV) pseudoparticle system (VSVpp) as a control. In addition, to verify that PCBP1  
263 knockdown did not affect luciferase reporter gene expression, we assessed firefly luciferase  
264 expression from cells directly transfected with a FLuc reporter plasmid. In all cases, we found  
265 that depleting endogenous PCBP1 had no impact on luciferase activity (**Figure 2**). This suggests  
266 that PCBP1 knockdown does not affect FLuc reporter expression, clathrin-mediated endocytosis,  
267 or the HCV entry process.

268

### 269 **PCBP1 knockdown has no impact of HCV translation or genome stability**

270 PCBP1 was previously reported to bind the HCV 5' UTR, which contains the viral IRES that  
271 drives translation of the viral polyprotein in the absence of most canonical translation initiation  
272 factors (2, 3, 11, 27). Furthermore, PCBP1 has been reported to contribute to the IRES-mediated  
273 translation of some cellular mRNAs such as Bag-1 and *c-myc* (28-30). Thus, it was plausible that  
274 PCBP1's interactions with the viral 5' UTR could affect viral protein expression by altering  
275 IRES-mediated translation. To assess PCBP1's impact on HCV translation, we used full-length  
276 J6/JFH-1 RLuc reporter RNAs containing an inactivating mutation in the NS5B polymerase gene  
277 (GNN). The RLuc activity thus served as a direct measure of HCV IRES-mediated translation,  
278 and over time, this signal also served as a proxy measure for viral RNA stability. We found that  
279 the siPCBP1 and siCTRL conditions had similar RLuc activity at all timepoints (**Figure 3**).  
280 Moreover, the luciferase signal half-lives were nearly identical, with 2.68 h (95% CI 1.64 – 4.64)  
281 for the siPCBP1 condition and 2.71 h (95% CI 1.43 – 5.50) for the siCTRL condition. Thus,  
282 PCBP1 knockdown does not appear to affect either viral IRES-mediated translation or genome  
283 stability.

284

### 285 **PCBP1 knockdown does not affect viral RNA replication**

286 PCBP1 has been reported to promote viral RNA replication by binding to the 5' UTR of several  
287 RNA viruses (31, 32). Thus, to specifically assess whether PCBP1 knockdown has an effect on  
288 HCV RNA replication, we assessed RLuc expression of replication-competent but assembly-  
289 deficient reporter RNAs (**Figure 4**). This includes the full-length WT J6/JFH-1 RLuc RNA, a  
290 subgenomic J6/JFH-1 replicon RNA containing a deletion of the structural protein genes ( $\Delta$ core-

291 p7), and a full-length J6/JFH-1 genome with a GFP insertion in the NS5A gene (NS5A-GFP),  
292 the latter previously shown to impair virion assembly without impairing viral RNA replication  
293 (7, 20). In all cases, we did not observe any significant differences in viral RNA accumulation  
294 between the siPCBP1 and siCTRL conditions (**Figure 4A-C**). This is seemingly in contrast to  
295 our findings using the JFH-1<sub>T</sub> system, where PCBP1 depletion decreased viral RNA  
296 accumulation (**Figure 1B-C and Supplementary Figure 1**). However, it is notable that all of the  
297 viral RNAs used in **Figure 4** are defective in viral packaging, including the full-length WT  
298 J6/JFH-1 RLuc RNA (**Figure 4A**), likely due to the large RLuc reporter gene insertion  
299 (**Supplementary Figure 2**). Thus, taken together, our data suggests that PCBP1 has no effect on  
300 the viral RNA replication step of the HCV life cycle.

301

### 302 **PCBP1 knockdown limits virus egress**

303 Finally, since knockdown of PCBP1 did not seem to have a significant impact on HCV entry,  
304 translation, genome stability or viral RNA replication, we reasoned that PCBP1 was likely to be  
305 exerting an effect on virion assembly and/or secretion. We had previously established that  
306 PCBP1 knockdown did not have a significant effect on intracellular viral titers yet resulted in an  
307 overall increase in extracellular (secreted) virions (**Figure 1D-E**). Thus, to further investigate  
308 whether PCBP1 plays a role in viral packaging and/or egress, we used a nucleoside analog, 2'-C-  
309 methyladenosine (2'CMA), to block viral RNA synthesis by the HCV NS5B RNA-dependent  
310 RNA polymerase and monitored viral titers over time (24). Similar to related studies using Zika  
311 virus, we reasoned that blocking viral RNA synthesis could allow us to assess viral packaging  
312 and egress in the absence of genomic RNA production (33).

313 To this end, we infected cells with JFH-1<sub>T</sub> and, three days post-infection, we replaced the  
314 culture media with media containing 5 μM 2'CMA (or DMSO, as a control) and collected total  
315 RNA, intracellular virions and extracellular virions over the next 12 h (**Figure 5A**). In agreement  
316 with our previous findings, we observed an overall reduction in JFH-1<sub>T</sub> viral RNA accumulation  
317 by day 3 post-infection in the siPCBP1 condition (0 h timepoint, **Figure 5B**). In addition, the  
318 2'CMA treatment efficiently blocked viral RNA accumulation, which continued to increase  
319 under the control (DMSO) condition (6-12 h timepoints, **Figure 5B**). Additionally, we observed  
320 similar initial intracellular titers as well as similar 2'CMA-induced decreases in intracellular  
321 titers under both the siPCBP1 and siCTRL conditions (**Figure 5C and D**). In contrast, we  
322 observed a continued rise in extracellular titers as packaged viruses continued to egress out of the  
323 cell, with the PCBP1 knockdown resulting in a >3-fold greater virus secretion rate than the  
324 siCTRL condition during 2'CMA treatment (**Figure 5E and F**). Notably, since inhibiting viral  
325 RNA synthesis equalized the intracellular virus accumulation rates yet failed to equalize the  
326 virus secretion rates, these results suggest that PCBP1 modulates the virion assembly and egress  
327 steps of the HCV life cycle.

328

## 329 **DISCUSSION**

330 Herein, we investigated the role of PCBP1 in the HCV life cycle. We found that PCBP1  
331 knockdown did not directly affect virus entry, translation, genome stability or viral RNA  
332 replication; but resulted in an increase in infectious particle secretion. Furthermore, since PCBP1  
333 knockdown does not alter intracellular infectious particle accumulation yet reduces total  
334 intracellular viral RNA, our results suggest that PCBP1 knockdown promotes virion assembly  
335 and egress.



336 Previous studies had found that PCBP1 interacts with the HCV 5' UTR *in vitro* (11, 16).  
337 Notably, the full 5' UTR appeared to be critical for PCBP1 binding, as truncated fragments of  
338 the 5' UTR were unable to bind to PCBP1 (11, 16). Somewhat more recently, PCBP1 was one of  
339 many host factors evaluated in a siRNA screen targeting cellular proteins predicted to interact  
340 with HCV (17). This screen revealed that PCBP1 knockdown decreased viral RNA accumulation  
341 approximately 2.3-fold, a result consistent with our observation that PCBP1 knockdown  
342 decreased JFH-1<sub>T</sub> viral RNA accumulation by approximately 2.2-fold (**Figure 1D**) (17).  
343 However, our systematic evaluation of the effect of PCBP1 knockdown on viral translation and  
344 viral RNA replication revealed that PCBP1 does not modulate either of these steps in the viral  
345 life cycle. Moreover, we did not observe any significant effects on viral entry or genome  
346 stability.

347 Initially, we were quite puzzled to find that PCBP1 did not affect viral RNA accumulation  
348 of a full-length WT J6/JFH-1 RLuc RNA; however, this RNA generates far fewer infectious  
349 viral particles than the JFH-1<sub>T</sub> strain we used for our infection experiments, likely due to the  
350 increased genome size due to the RLuc insertion resulting in reduced packaging efficiency  
351 (**Supplementary Figure S2**) (14). The fact that PCBP1 knockdown failed to have a significant  
352 impact on the luciferase reporter RNA is therefore consistent with a model whereby PCBP1  
353 primarily acts at the level of virion assembly and egress (**Figure 6**). As such, knockdown of  
354 PCBP1 results in an overall decrease in the translating/replicating pool of viral RNAs and a  
355 concomitant increase in extracellular (secreted) virions. Since intracellular viral titers remained  
356 similar in PCBP1 knockdown and control conditions, a greater proportion of the intracellular  
357 viral RNA must represent viral RNA packaged into virions, implying that endogenous PCBP1  
358 normally limits virion assembly. This model is further supported by our finding that 2'CMA

359 equalized the rate of intracellular virus accumulation yet resulted in a virus secretion rate >3-fold  
360 greater during PCBP1 knockdown, suggesting that endogenous PCBP1 limits virion egress.  
361 Moreover, this model is consistent with the observed decreases in viral protein expression and  
362 negative-strand replicative intermediate accumulation (**Figure 1B and Supplementary Figure**  
363 **1**), since increasing viral genome packaging into new virions would sequester the RNA from the  
364 translation and RNA replication machinery. Thus, endogenous PCBP1 normally limits viral  
365 assembly and egress, and PCBP1 knockdown therefore indirectly impairs viral protein synthesis  
366 and viral RNA replication by liberating the RNA for virion assembly and egress.

367 Notably, PCBP1 has been previously implicated in turnover of MAVS, a signal  
368 transduction protein directly downstream of RIG-I, which is known to limit HCV infection (34).  
369 However, all of our conclusions were drawn from experiments conducted in the Huh-7.5 cell  
370 line, which has well-documented defects in the RIG-I antiviral signalling pathway, and our own  
371 brief explorations of interferon induction and MAVS turnover did not reveal any significant  
372 differences between PCBP1 knockdown and control conditions (data not shown) (35). Moreover,  
373 the HCV NS3-4A protease also inactivates MAVS during infection to reduce antiviral signaling  
374 and recognition of the viral RNA (36, 37). However, as hepatocytes typically express RIG-I and  
375 MAVS, we cannot rule out the possibility that PCBP1 may modulate this pathway during  
376 infection *in vivo*.

377 Finally, PCBP1's closely related paralogs, hnRNP K and PCBP2, have been more  
378 extensively studied during HCV infection. While the hnRNP K protein was shown to restrict  
379 infectious virion production, the PCBP2 protein has been suggested to modulate viral translation  
380 and RNA replication (14, 15). Since the PCBP1 amino acid identity is far more similar to PCBP2  
381 (~80% identity) than hnRNP K (~24% identity), we were initially surprised that our findings for

382 PCBP1 in HCV infection closely matched those reported for hnRNP K. Yet, while PCBP1 and  
383 PCBP2 have been shown to perform similar functions, they have also been reported to play  
384 distinct roles during poliovirus, VSV, and human immunodeficiency virus infection (31, 38, 39).  
385 In addition to the similarities we observed with PCBP1 and those previously reported with  
386 hnRNP K during HCV infection, our results and conclusions also echo those reported for the  
387 IGF2BP2/YBX-1 complex, METTL3/METTL14 N<sup>6</sup>-methyladenosine (m<sup>6</sup>A) writers, and the  
388 YTHDF m<sup>6</sup>A-binding proteins (14, 40, 41). These have all been reported to inhibit HCV  
389 infectious particle production, with no effect on viral translation or RNA replication – with the  
390 exception of the IGF2BP2/YBX-1 complex, which plays an additional role in facilitating viral  
391 RNA replication (40). It is currently unclear if PCBP1, hnRNP K, the YBX-1 complex or m<sup>6</sup>A  
392 modifications of the HCV genome inhibit virion assembly as components of a common pathway,  
393 or through distinct and/or additive mechanisms. Interestingly, high-throughput affinity capture  
394 and proximity ligation studies have found that PCBP1 interacts with hnRNP K, IGF2BP2, YBX-  
395 1, METTL3 and METTL14; although this has been demonstrated only in non-hepatic cell lines  
396 to date (42-44). Should these interactions be conserved during HCV infection, it seems plausible  
397 that PCBP1 could participate in these virion assembly inhibition pathways – or, conversely, that  
398 it may have an inhibitory role to promote one pathway over another. Future investigations will  
399 reveal whether these proteins function in an overlapping or a distinct manner; and are likely to  
400 improve our understanding of HCV virion assembly and how this process is regulated by cellular  
401 RNA binding proteins.

402 Taken together, our results support a model where endogenous PCBP1 limits HCV  
403 infectious particle production. By preventing virion assembly and egress, PCBP1 indirectly  
404 enhances viral RNA accumulation. The model presented herein helps to inform understanding of

405 how cellular RNA-binding proteins modulate HCV genomic RNA utilization during the viral life  
406 cycle, specifically as it pertains to virion assembly. While the precise molecular mechanism  
407 employed by PCBP1 to inhibit HCV assembly and egress remains to be characterized, similar  
408 phenotypes reported for hnRNP K, IGF2BP2/YBX-1 and m<sup>6</sup>A modifications of the HCV  
409 genome offer promising leads for future investigations.

410 **ACKNOWLEDGEMENTS**

411 We would like to acknowledge Charlie Rice (Rockefeller University) for kindly providing the  
412 Huh-7.5 cells, pJ6/JFH FL RLuc WT and GNN plasmids; Rodney Russell (Memorial University)  
413 for providing JFH-1<sub>T</sub>; Mamata Panigrahi and Joyce Wilson (University of Saskatchewan) for the  
414 pJ6/JFH mono RLuc NS2 plasmid; Martin J Richer (McGill University) for the 293T cells; and  
415 John Law (University of Alberta) for supplying the HCVpp used herein. We are also grateful to  
416 Nathan Taylor, Julie Magnus and Carolina Camargo (McGill University) for technical support.

417

418 **FUNDING INFORMATION**

419 This research was supported by the Canadian Institutes for Health Research (CIHR) [MOP-  
420 136915 and PJT-169214]. S.E.C. was supported by the Canadian Network on Hepatitis C  
421 (CanHepC) training program, as well as a Vanier Canada Graduate Scholarship. In addition, this  
422 research was undertaken, in part, thanks to the Canada Research Chairs program (S.M.S.).

423

424 **AUTHOR CONTRIBUTIONS**

425 S.E.C. and S.M.S. designed the study; S.E.C. performed the experiments and analyzed the data,  
426 and S.E.C and S.M.S. wrote and edited the manuscript.

## 427 REFERENCES

- 428 1. **Simmonds P, Becher P, Bukh J, Gould EA, Meyers G, Monath T, Muerhoff S,**  
429 **Pletnev A, Rico-Hesse R, Smith DB, Stapleton JT, ICTV Report Consortium.** 2017.  
430 ICTV Virus Taxonomy Profile: Flaviviridae. *J Gen Virol* **98**:2–3.
- 431 2. **Tsukiyama-Kohara K, Iizuka N, Kohara M, Nomoto A.** 1992. Internal ribosome entry  
432 site within hepatitis C virus RNA. *Journal of Virology* **66**:1476–1483.
- 433 3. **Lancaster AM, Jan E, Sarnow P.** 2006. Initiation factor-independent translation  
434 mediated by the hepatitis C virus internal ribosome entry site. *RNA* **12**:894–902.
- 435 4. **Lohmann V, Korner F, Koch J, Herian U, Theilmann L, Bartenschlager R.** 1999.  
436 Replication of subgenomic hepatitis C virus RNAs in a hepatoma cell line. *Science*  
437 **285**:110–113.
- 438 5. **Jones CT, Murray CL, Eastman DK, Tassello J, Rice CM.** 2007. Hepatitis C virus p7  
439 and NS2 proteins are essential for production of infectious virus. *Journal of Virology*  
440 **81**:8374–8383.
- 441 6. **Jones DM, Atoom AM, Zhang X, Kottlil S, Russell RS.** 2011. A genetic interaction  
442 between the core and NS3 proteins of hepatitis C virus is essential for production of  
443 infectious virus. *Journal of Virology* **85**:12351–12361.
- 444 7. **Masaki T, Suzuki R, Murakami K, Aizaki H, Ishii K, Murayama A, Date T,**  
445 **Matsuura Y, Miyamura T, Wakita T, Suzuki T.** 2008. Interaction of hepatitis C virus  
446 nonstructural protein 5A with core protein is critical for the production of infectious virus  
447 particles. *Journal of Virology* **82**:7964–7976.
- 448 8. **Appel N, Zayas M, Miller S, Krijnse-Locker J, Schaller T, Friebe P, Kallis S, Engel**  
449 **U, Bartenschlager R.** 2008. Essential role of domain III of nonstructural protein 5A for  
450 hepatitis C virus infectious particle assembly. *PLoS Pathog* **4**:e1000035.
- 451 9. **Matunis MJ, Michael WM, Dreyfuss G.** 1992. Characterization and primary structure of  
452 the poly(C)-binding heterogeneous nuclear ribonucleoprotein complex K protein. *Mol*  
453 *Cell Biol* **12**:164–171.
- 454 10. **Du Z, Lee JK, Fenn S, Tjhen R, Stroud RM, James TL.** 2007. X-ray crystallographic  
455 and NMR studies of protein-protein and protein-nucleic acid interactions involving the  
456 KH domains from human poly(C)-binding protein-2. *RNA* **13**:1043–1051.
- 457 11. **Spångberg K, Schwartz S.** 1999. Poly(C)-binding protein interacts with the hepatitis C  
458 virus 5' untranslated region **80**:1371–1376.
- 459 12. **Flynn RA, Martin L, Spitale RC, Do BT, Sagan SM, Zarnegar B, Qu K, Khavari PA,**  
460 **Quake SR, Sarnow P, Chang HY.** 2015. Dissecting noncoding and pathogen RNA-  
461 protein interactomes. *RNA* **21**:135–143.

- 462 13. **Fan B, Lu K-Y, Reymond Sutandy FX, Chen Y-W, Konan K, Zhu H, Kao CC, Chen**  
463 **C-S.** 2014. A human proteome microarray identifies that the heterogeneous nuclear  
464 ribonucleoprotein K (hnRNP K) recognizes the 5' terminal sequence of the hepatitis C  
465 virus RNA. *Mol Cell Proteomics* **13**:84–92.
- 466 14. **Poenisch M, Metz P, Blankenburg H, Ruggieri A, Lee J-Y, Rupp D, Rebhan I,**  
467 **Diederich K, Kaderali L, Domingues FS, Albrecht M, Lohmann V, Erfle H,**  
468 **Bartenschlager R.** 2015. Identification of HNRNPK as Regulator of Hepatitis C Virus  
469 Particle Production. *PLoS Pathog* **11**:e1004573–21.
- 470 15. **Wang L, Jeng K-S, Lai MMC.** 2011. Poly(C)-binding protein 2 interacts with sequences  
471 required for viral replication in the hepatitis C virus (HCV) 5' untranslated region and  
472 directs HCV RNA replication through circularizing the viral genome. *Journal of Virology*  
473 **85**:7954–7964.
- 474 16. **Choi K, Kim JH, Li X, Paek KY, Ha SH, Ryu SH, Wimmer E, Jang SK.** 2004.  
475 Identification of cellular proteins enhancing activities of internal ribosomal entry sites by  
476 competition with oligodeoxynucleotides. *Nucleic Acids Research* **32**:1308–1317.
- 477 17. **Randall G, Panis M, Cooper JD, Tellinghuisen TL, Sukhodolets KE, Pfeffer S,**  
478 **Landthaler M, Landgraf P, Kan S, Lindenbach BD, Chien M, Weir DB, Russo JJ, Ju**  
479 **J, Brownstein MJ, Sheridan R, Sander C, Zavolan M, Tuschl T, Rice CM.** 2007.  
480 Cellular cofactors affecting hepatitis C virus infection and replication. *PNAS* **104**:12884–  
481 12889.
- 482 18. **Russell RS, Meunier J-C, Takikawa S, Faulk K, Engle RE, Bukh J, Purcell RH,**  
483 **Emerson SU.** 2008. Advantages of a single-cycle production assay to study cell culture-  
484 adaptive mutations of hepatitis C virus. *Proc Natl Acad Sci USA* **105**:4370–4375.
- 485 19. **Panigrahi M, Thibault PA, Wilson JA.** 2021. Chapter 7: miR-122 affects both the early  
486 and late stages of a Hepatitis C Virus infection, pp. 129–165. *In* miR-122-independent  
487 propagation of Hepatitis C Virus: Understanding the underlying mechanism through  
488 characterization of viral replication [dissertation]. Saskatoon: University of Saskatchewan;  
489 2021.
- 490 20. **Moradpour D, Evans MJ, Gosert R, Yuan Z, Blum HE, Goff SP, Lindenbach BD,**  
491 **Rice CM.** 2004. Insertion of green fluorescent protein into nonstructural protein 5A  
492 allows direct visualization of functional hepatitis C virus replication complexes. *Journal of*  
493 *Virology* **78**:7400–7409.
- 494 21. **Amador-Cañizares Y, Bernier A, Wilson JA, Sagan SM.** 2018. miR-122 does not  
495 impact recognition of the HCV genome by innate sensors of RNA but rather protects the  
496 5' end from the cellular pyrophosphatases, DOM3Z and DUSP11. *Nucleic Acids Research*  
497 **46**:5139–5158.

- 498 22. **Machlin ES, Sagan SM, Sarnow P.** 2011. Masking the 5' terminal nucleotides of the  
499 hepatitis C virus genome by an unconventional microRNA-target RNA complex. *PNAS*  
500 **108**:3193–3198.
- 501 23. **Hsu M, Zhang J, Flint M, Logvinoff C, Cheng-Mayer C, Rice CM, McKeating JA.**  
502 2003. Hepatitis C virus glycoproteins mediate pH-dependent cell entry of pseudotyped  
503 retroviral particles. *PNAS* **100**:7271–7276.
- 504 24. **Carroll SS, Tomassini JE, Bosserman M, Getty K, Stahlhut MW, Eldrup AB, Bhat**  
505 **B, Hall D, Simcoe AL, LaFemina R, Rutkowski CA, Wolanski B, Yang Z, Migliaccio**  
506 **G, De Francesco R, Kuo LC, MacCoss M, Olsen DB.** 2003. Inhibition of hepatitis C  
507 virus RNA replication by 2'-modified nucleoside analogs. *Journal of Biological Chemistry*  
508 **278**:11979–11984.
- 509 25. **Schindelin J, Arganda-Carreras I, Frise E, Kaynig V, Longair M, Pietzsch T,**  
510 **Preibisch S, Rueden C, Saalfeld S, Schmid B, Tinevez J-Y, White DJ, Hartenstein V,**  
511 **Eliceiri K, Tomancak P, Cardona A.** 2012. Fiji: an open-source platform for biological-  
512 image analysis. *Nat Meth* **9**:676–682.
- 513 26. **Livak KJ, Schmittgen TD.** 2001. Analysis of Relative Gene Expression Data Using  
514 Real-Time Quantitative PCR and the  $2^{-\Delta\Delta CT}$  Method. *Methods* **25**:402–408.
- 515 27. **Wang C, Sarnow P, Siddiqui A.** 1993. Translation of Human Hepatitis C Virus RNA in  
516 Cultured Cells Is Mediated by an Internal Ribosome-Binding Mechanism. *Journal of*  
517 *Virology* **67**:3338–3344.
- 518 28. **Le Quesne JPC, Stoneley M, Fraser GA, Willis AE.** 2001. Derivation of a structural  
519 model for the c-myc IRES. *Journal of Molecular Biology* **310**:111–126.
- 520 29. **Pickering BM, Mitchell SA, Spriggs KA, Stoneley M, Willis AE.** 2004. Bag-1 internal  
521 ribosome entry segment activity is promoted by structural changes mediated by poly(rC)  
522 binding protein 1 and recruitment of polypyrimidine tract binding protein 1. *Mol Cell Biol*  
523 **24**:5595–5605.
- 524 30. **Evans JR, Mitchell SA, Spriggs KA, Ostrowski J, Bomsztyk K, Ostarek D, Willis**  
525 **AE.** 2003. Members of the poly (rC) binding protein family stimulate the activity of the c-  
526 myc internal ribosome entry segment in vitro and in vivo. *Oncogene* **22**:8012–8020.
- 527 31. **Walter BL, Parsley TB, Ehrenfeld E, Semler BL.** 2002. Distinct Poly(rC) Binding  
528 Protein KH Domain Determinants for Poliovirus Translation Initiation and Viral RNA  
529 Replication. *Journal of Virology* **76**:12008–12022.
- 530 32. **Luo Z, Dong X, Li Y, Zhang Q, Kim C, Song Y, Kang L, Liu Y, Wu K, Wu J.** 2014.  
531 PolyC-Binding Protein 1 Interacts with 5'-Untranslated Region of Enterovirus 71 RNA in  
532 Membrane-Associated Complex to Facilitate Viral Replication. *PLoS ONE* **9**:e87491–13.



- 533 33. **Taguwa S, Yeh M-T, Rainbolt TK, Nayak A, Shao H, Gestwicki JE, Andino R,**  
534 **Frydman J.** 2019. Zika Virus Dependence on Host Hsp70 Provides a Protective Strategy  
535 against Infection and Disease. *CellReports* **26**:906–920.e3.
- 536 34. **Zhou X, You F, Chen H, Jiang Z.** 2012. Poly(C)-binding protein 1 (PCBP1) mediates  
537 housekeeping degradation of mitochondrial antiviral signaling (MAVS). *Cell Res* **22**:717–  
538 727.
- 539 35. **Sumpter R, Loo Y-M, Foy E, Li K, Yoneyama M, Fujita T, Lemon SM, Gale M.**  
540 2005. Regulating intracellular antiviral defense and permissiveness to hepatitis C virus  
541 RNA replication through a cellular RNA helicase, RIG-I. *Journal of Virology* **79**:2689–  
542 2699.
- 543 36. **Meylan E, Curran J, Hofmann K, Moradpour D, Binder M, Bartenschlager R,**  
544 **Tschopp J.** 2005. Cardif is an adaptor protein in the RIG-I antiviral pathway and is  
545 targeted by hepatitis C virus. *Nature* **437**:1167–1172.
- 546 37. **Bender S, Reuter A, Eberle F, Einhorn E, Binder M, Bartenschlager R.** 2015.  
547 Activation of Type I and III Interferon Response by Mitochondrial and Peroxisomal  
548 MAVS and Inhibition by Hepatitis C Virus. *PLoS Pathog* **11**:e1005264–30.
- 549 38. **Dinh PX, Beura LK, Panda D, Das A, Pattnaik AK.** 2011. Antagonistic effects of  
550 cellular poly(C) binding proteins on vesicular stomatitis virus gene expression. *Journal of*  
551 *Virology*, 3rd ed. **85**:9459–9471.
- 552 39. **Woolaway K, Asai K, Emili A, Cochrane A.** 2007. hnRNP E1 and E2 have distinct roles  
553 in modulating HIV-1 gene expression. *Retrovirology* **4**:28–18.
- 554 40. **Chatel-Chaix L, Germain M-A, Motorina A, Bonneil É, Thibault P, Baril M,**  
555 **Lamarre D.** 2013. A host YB-1 ribonucleoprotein complex is hijacked by hepatitis C  
556 virus for the control of NS3-dependent particle production. *Journal of Virology* **87**:11704–  
557 11720.
- 558 41. **Gokhale NS, McIntyre ABR, McFadden MJ, Roder AE, Kennedy EM, Gandara JA,**  
559 **Hopcraft SE, Quicke KM, Vazquez C, Willer J, Ilkayeva OR, Law BA, Holley CL,**  
560 **Garcia-Blanco MA, Evans MJ, Suthar MS, Bradrick SS, Mason CE, Horner SM.**  
561 2016. N6-Methyladenosine in Flaviviridae Viral RNA Genomes Regulates Infection. *Cell*  
562 *Host & Microbe* **20**:654–665.
- 563 42. **Rosenbluh J, Mercer J, Shrestha Y, Oliver R, Tamayo P, Doench JG, Tirosh I,**  
564 **Piccioni F, Hartenian E, Horn H, Fagbami L, Root DE, Jaffe J, Lage K, Boehm JS,**  
565 **Hahn WC.** 2016. Genetic and Proteomic Interrogation of Lower Confidence Candidate  
566 Genes Reveals Signaling Networks in  $\beta$ -Catenin-Active Cancers. *Cell Syst* **3**:302–316.e4.
- 567 43. **Youn J-Y, Dunham WH, Hong SJ, Knight JDR, Bashkurov M, Chen GI, Bagci H,**  
568 **Rathod B, MacLeod G, Eng SWM, Angers S, Morris Q, Fabian M, Côté J-F,**

- 569           **Gingras A-C.** 2018. High-Density Proximity Mapping Reveals the Subcellular  
570           Organization of mRNA-Associated Granules and Bodies. *Molecular Cell* **69**:517–532.e11.
- 571   44.   **Yue Y, Liu J, Cui X, Cao J, Luo G, Zhang Z, Cheng T, Gao M, Shu X, Ma H, Wang**  
572   **F, Wang X, Shen B, Wang Y, Feng X, He C, Liu J.** 2018. VIRMA mediates preferential  
573   m(6)A mRNA methylation in 3'UTR and near stop codon and associates with alternative  
574   polyadenylation. *Cell Discov* **4**:10.
- 575

576 **FIGURE LEGENDS**

577

578 **Figure 1. PCBP1 knockdown decreases viral protein expression and intracellular viral**

579 **RNA accumulation, but increases secreted virus titers. (A)** Schematic representation of the

580 HCVcc (JFH-1<sub>T</sub>) infectious particles and genomic RNA used in infections. Huh-7.5 cells were

581 transfected with siPCBP1 or siCTRL at day -2, and at day 0 were infected with JFH-1<sub>T</sub> (MOI =

582 0.05). Viral protein, Total RNA and intracellular and extracellular infectious virus were

583 harvested at day 3 post-infection. **(B)** Viral protein expression analysis by Western blot (ns

584 indicates non-specific band; and arrow indicates core and NS5A bands). **(C)** Viral RNA

585 accumulation analysis by Northern blot, and **(D)** quantification by densitometry. **(E)** Intracellular

586 and **(F)** extracellular (secreted) virus titers, quantified by FFU assay. All data are representative

587 of three independent replicates, and error bars represent the standard deviation of the mean. P-

588 values were calculated by paired t-test.

589

590 **Figure 2. PCBP1 knockdown has no effect on HCV entry.** Two days post-siRNA transfection,

591 cells were spinoculated with luciferase reporter pseudoparticles expressing the HCV E1/E2

592 glycoproteins (HCVpp) or the VSV-G glycoprotein (VSVpp). In parallel, cells were transfected

593 with a firefly luciferase expression plasmid. Samples were harvested 3 days post-

594 infection/transfection, and analyzed by luciferase assay. The HCVpp and pFLuc data is

595 representative of three independent replicates, while the VSVpp data is representative of two

596 independent replicates. Error bars represent the standard deviation of the mean.

597

598 **Figure 3. PCBP1 knockdown has no impact on HCV translation or genome stability. (A)**

599 Schematic representation of the J6/JFH-RLuc-GNN reporter RNA. **(B)** Huh-7.5 cells were  
600 electroporated with J6/JFH-1-RLuc-GNN reporter RNAs and FLuc control mRNA, and  
601 luciferase activity was monitored at several timepoints post-electroporation. All data are  
602 representative of three independent replicates. Error bars on the y-axis represent the standard  
603 deviation of the mean, while error bars on the x-axis indicate the range of sample harvest times  
604 across replicates.

605

606 **Figure 4. PCBP1 knockdown does not affect viral RNA replication.** Two days post-siRNA

607 transfection, Huh-7.5 cells were electroporated with **(A)** full-length RLuc WT J6/JFH-1 RNA,  
608 **(B)**  $\Delta$ core-p7 J6/JFH-1 RLuc RNA, or **(C)** full-length NS5A-GFP J6/JFH-1 RLuc RNA. RLuc  
609 values were normalized to the early timepoint (3h), to control for disparities in electroporation  
610 efficiency between experiments. All data are representative of three independent replicates and  
611 error bars represent the standard deviation of the mean.

612

613 **Figure 5. Viral particle production after 2'CMA treatment confirms that PCBP1**

614 **knockdown enhances virion secretion. (A)** Schematic representation of the experimental  
615 approach for 2'CMA experiments: two days post-siRNA transfection, Huh-7.5 cells were  
616 infected with JFH-1<sub>T</sub> (MOI = 0.05). Three days post-infection, cells were treated with 2'CMA or  
617 DMSO (control). Total RNA, intracellular and extracellular virus was collected at t = 0, 6 and 12  
618 h post-treatment. **(B)** Quantitative RT-PCR analysis after 2'CMA treatment. **(C)** Intracellular  
619 viral titers and **(D)** intracellular virus accumulation rate calculated by linear regression. **(E)**  
620 Extracellular viral titers and **(F)** virus secretion rates calculated by linear regression. All data are

621 representative of three independent replicates and error bars in (B), (C) and (E) represent the  
622 standard deviation of the mean. Error bars in (D) and (F) represent the slopes of the linear  
623 regressions  $\pm$  standard error. P-values were calculated by two-way ANOVA.

624

625 **Figure 6. Model for PCBP1 effects on HCV assembly and egress.** Under wild-type  
626 conditions, PCBP1 inhibits HCV assembly and egress, leaving the majority of intracellular viral  
627 RNAs to engage in protein translation and viral genome replication. However, during PCBP1  
628 knockdown, a disinhibition of assembly and egress leads to an overall decrease in the  
629 translating/replicating pool of viral RNAs, and a concomitant increase in viral infectious particle  
630 production.

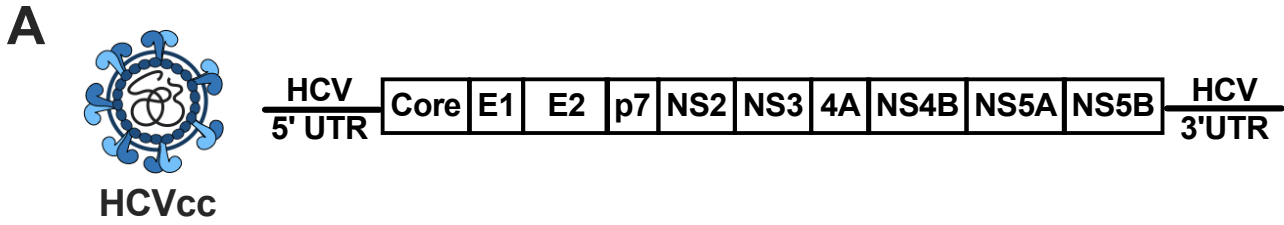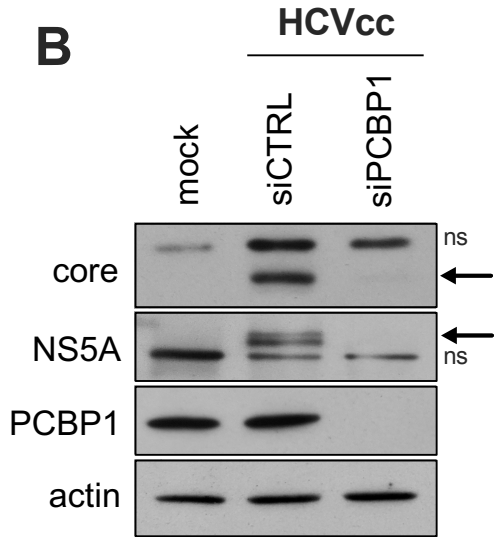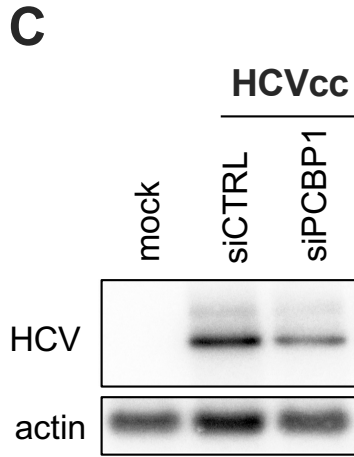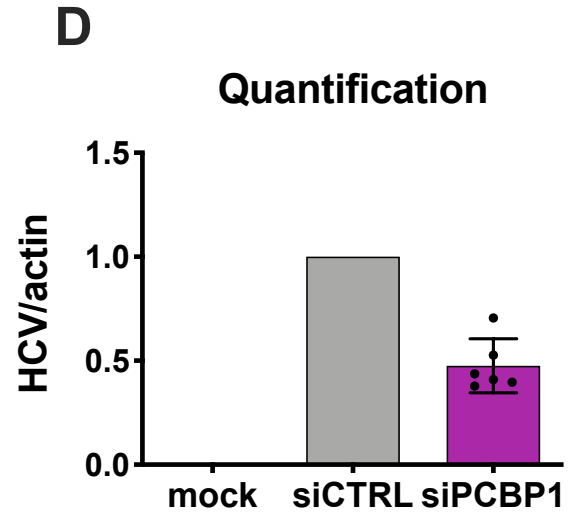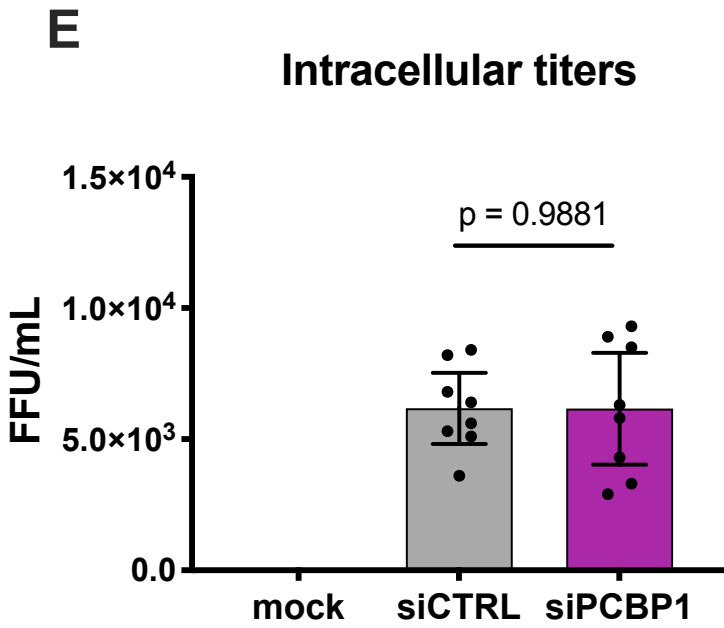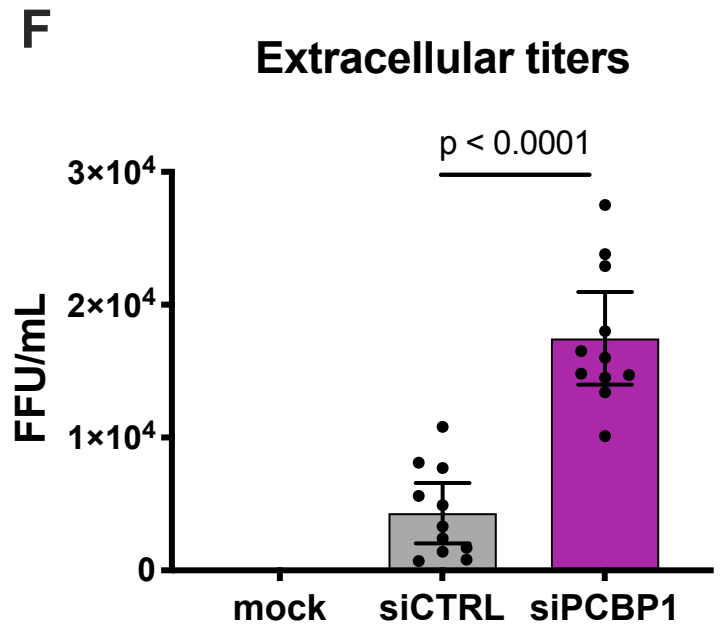

Figure 1

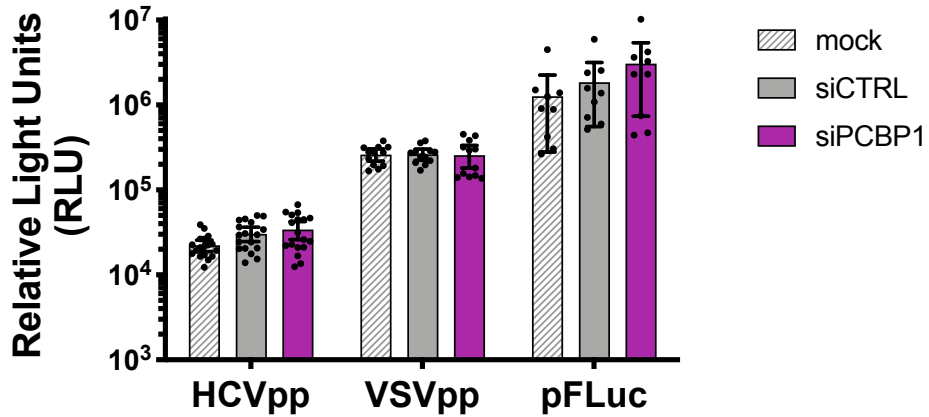

Figure 2

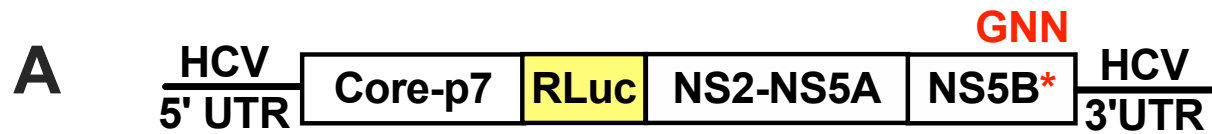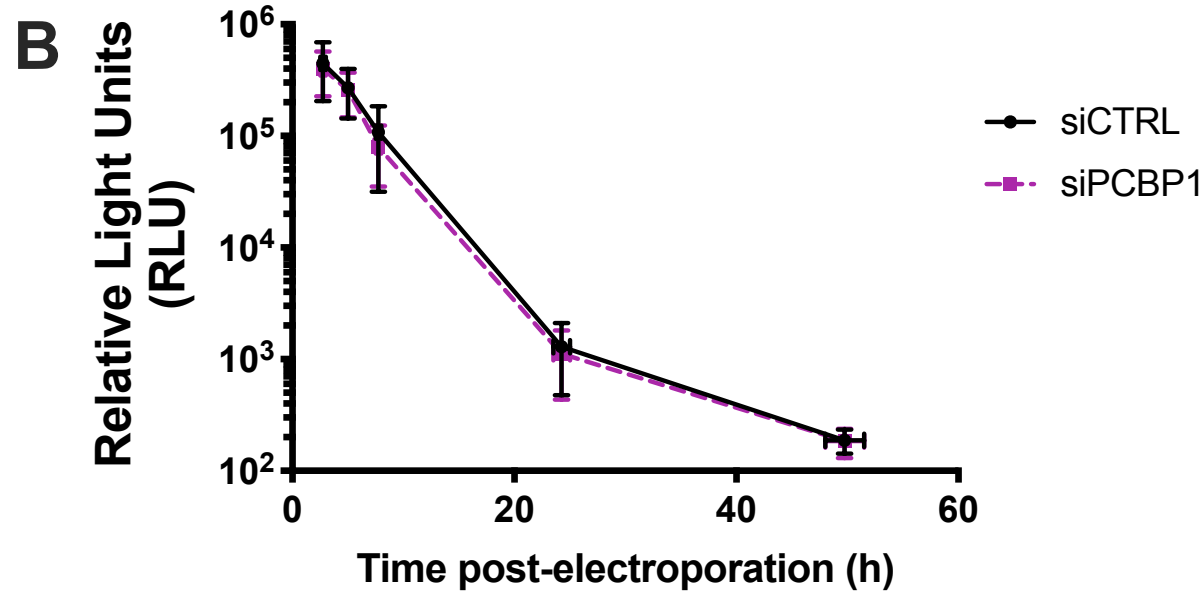

**Figure 3**



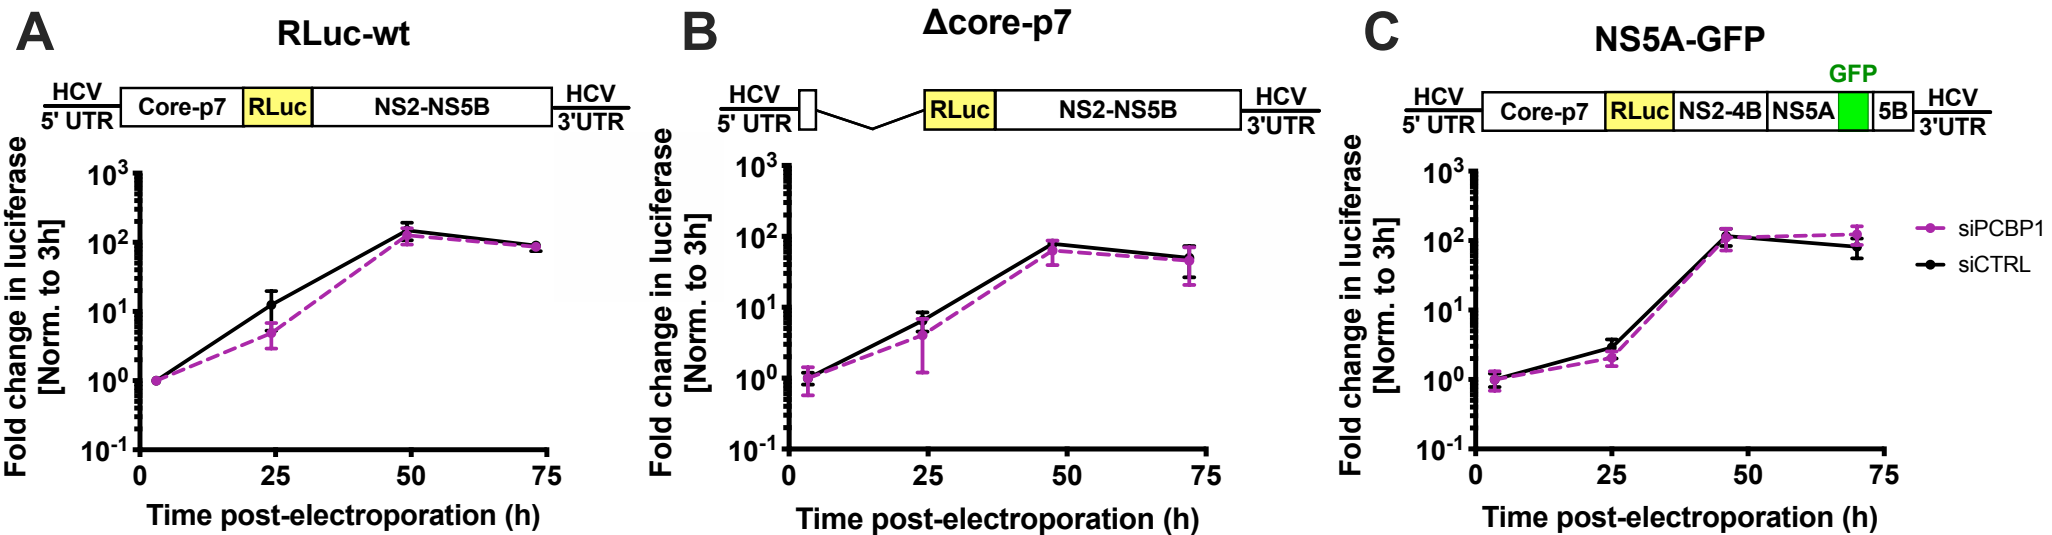

**Figure 4**

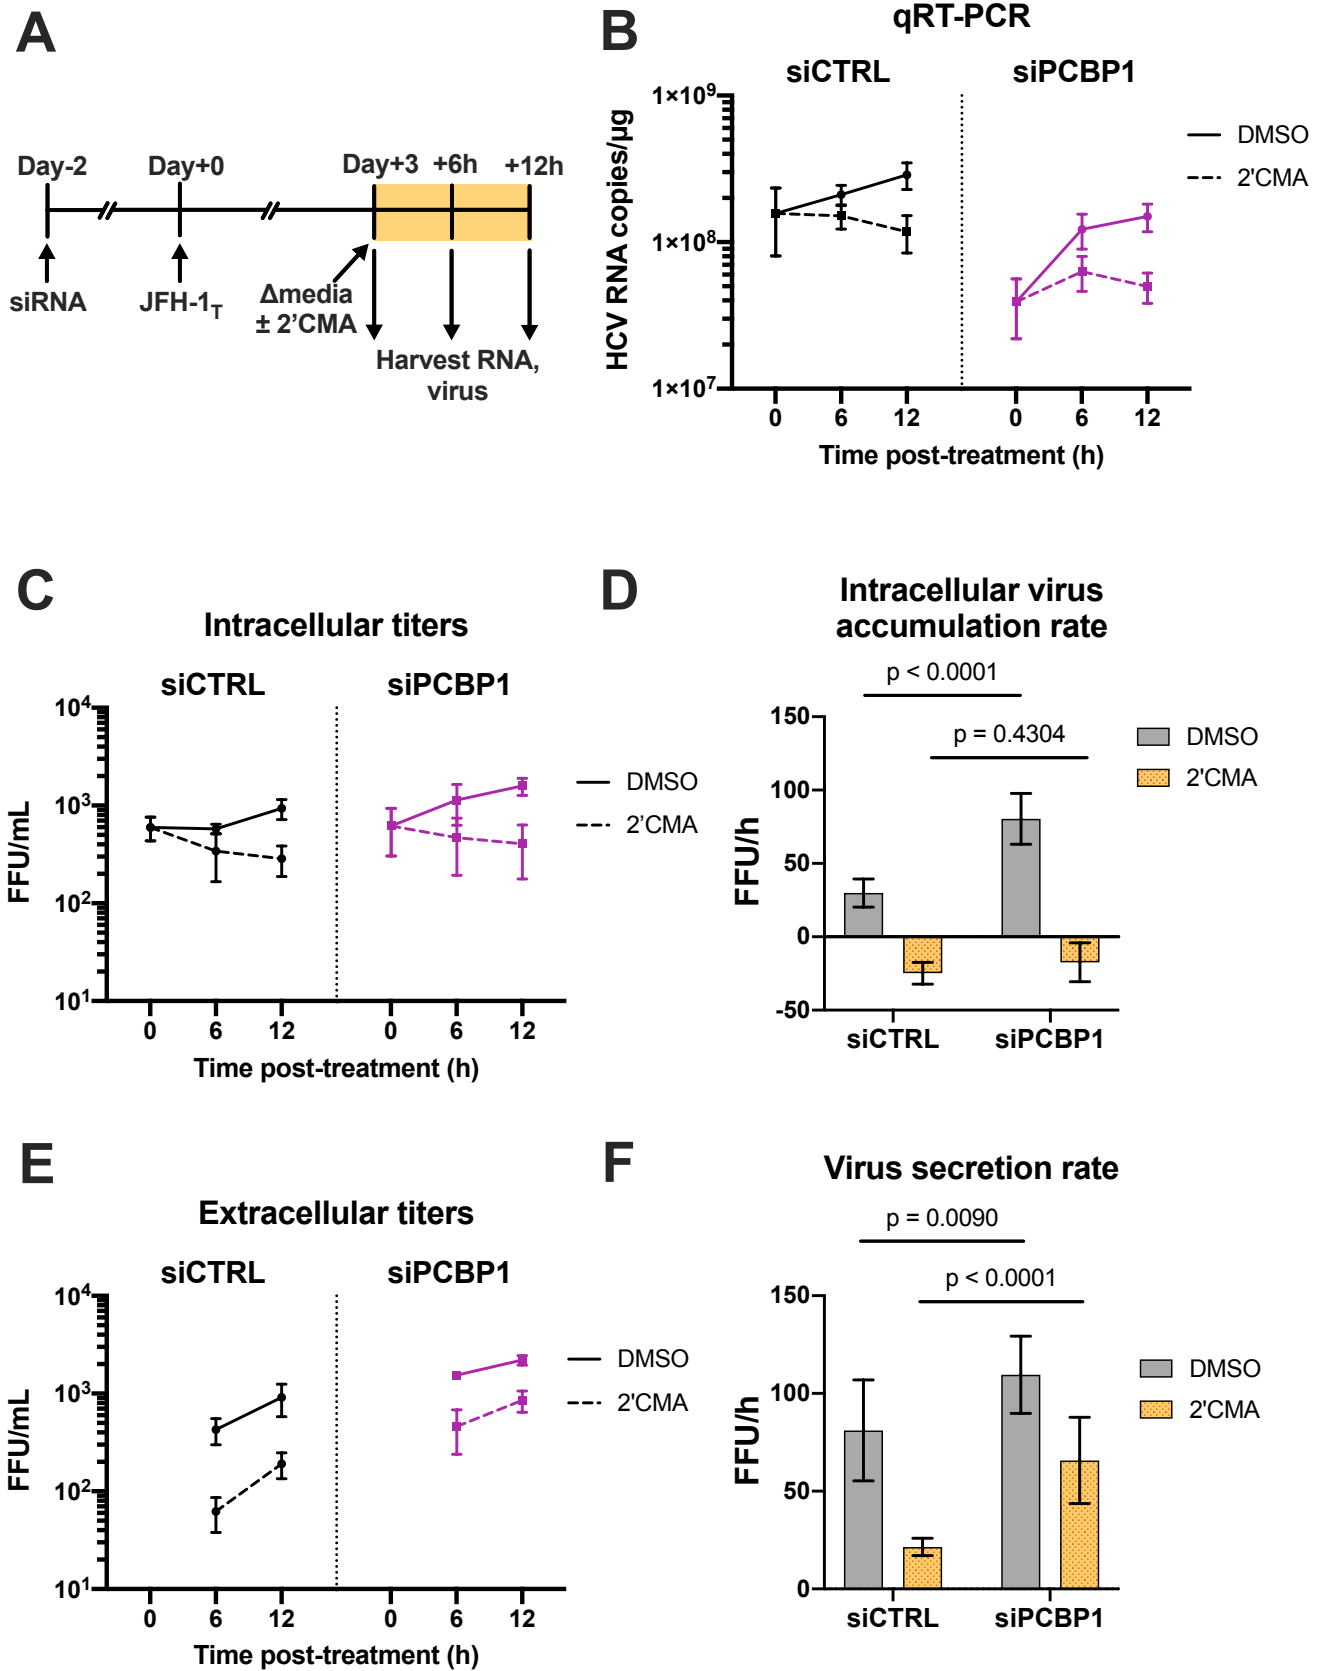

**Figure 5**

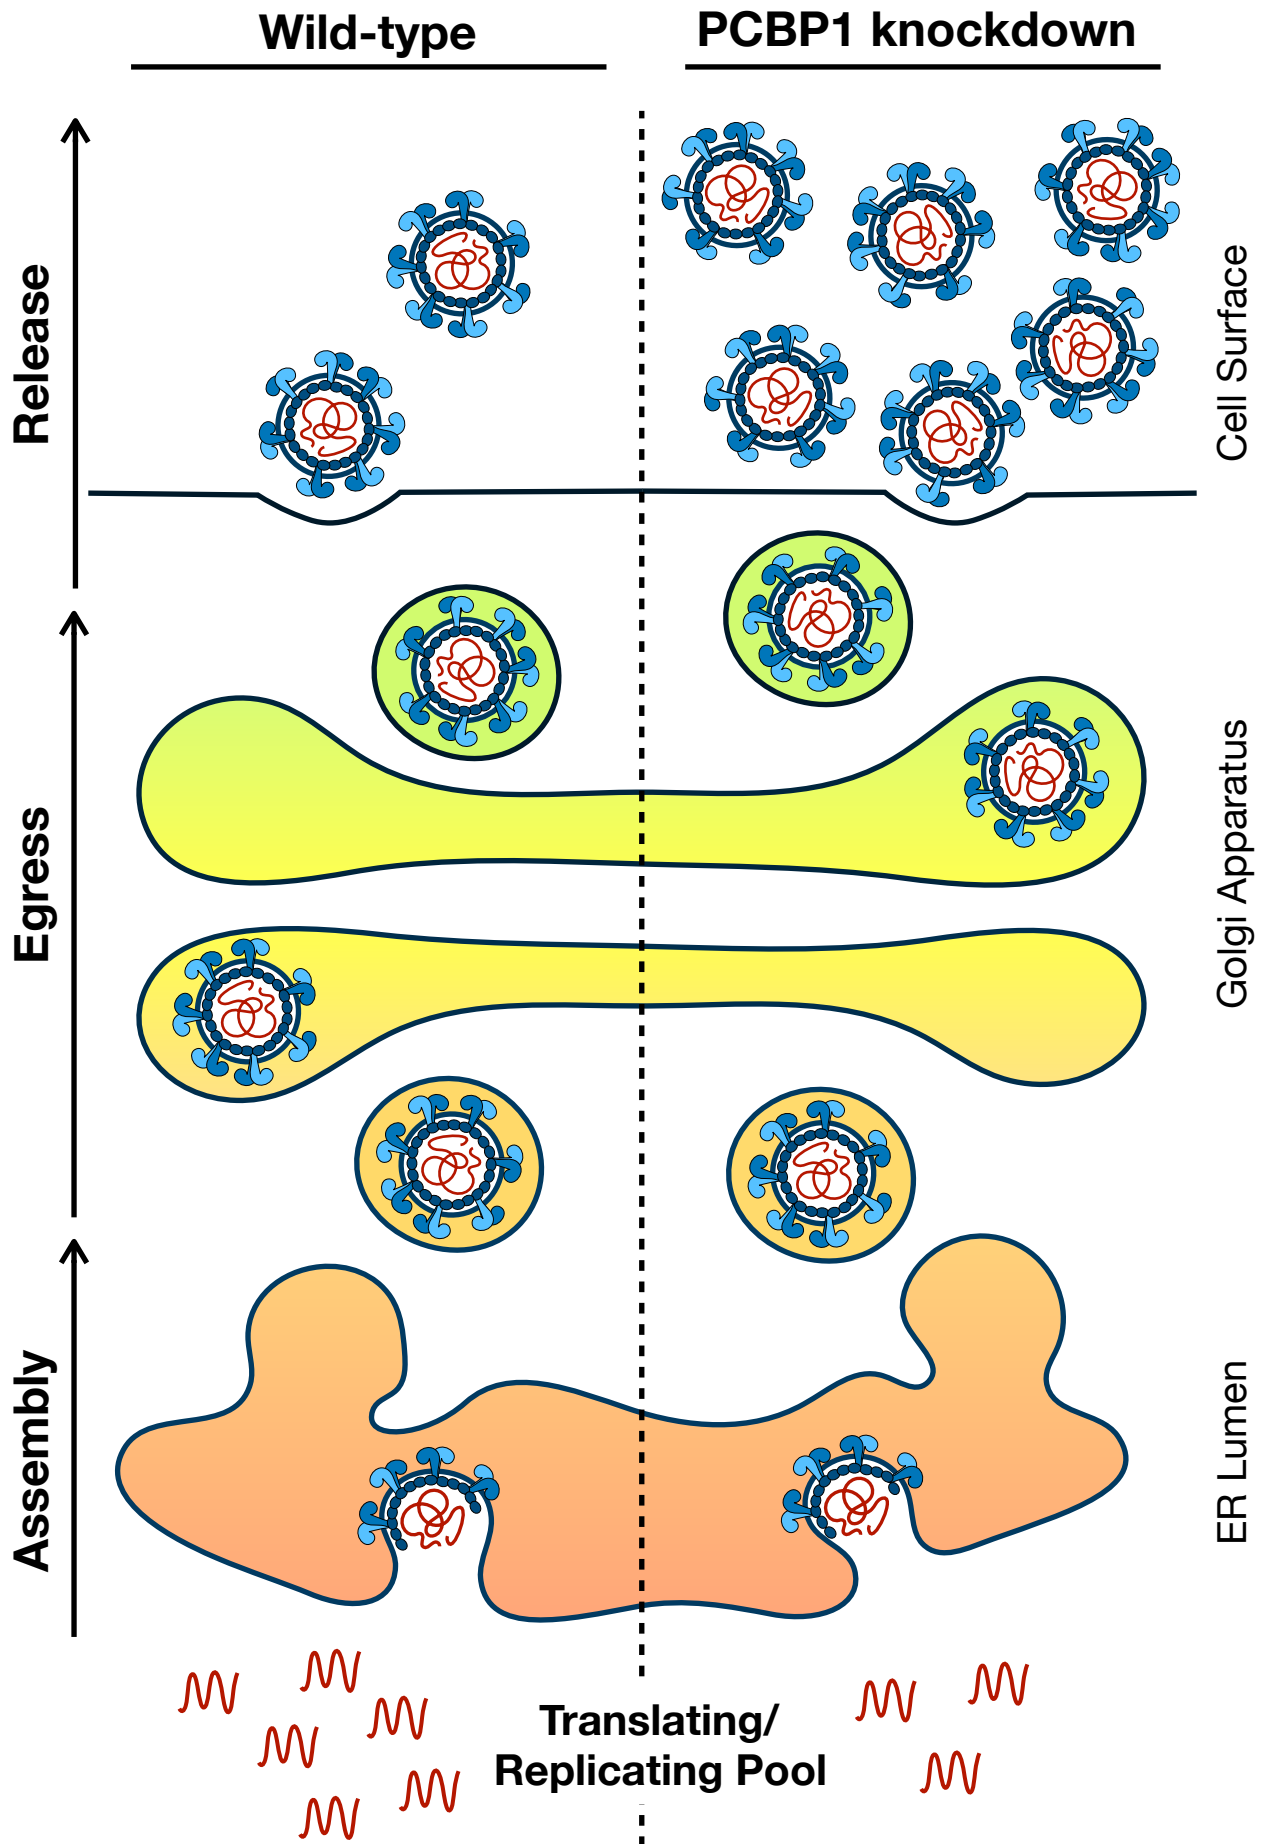

Figure 6

## SUPPLEMENTARY MATERIAL

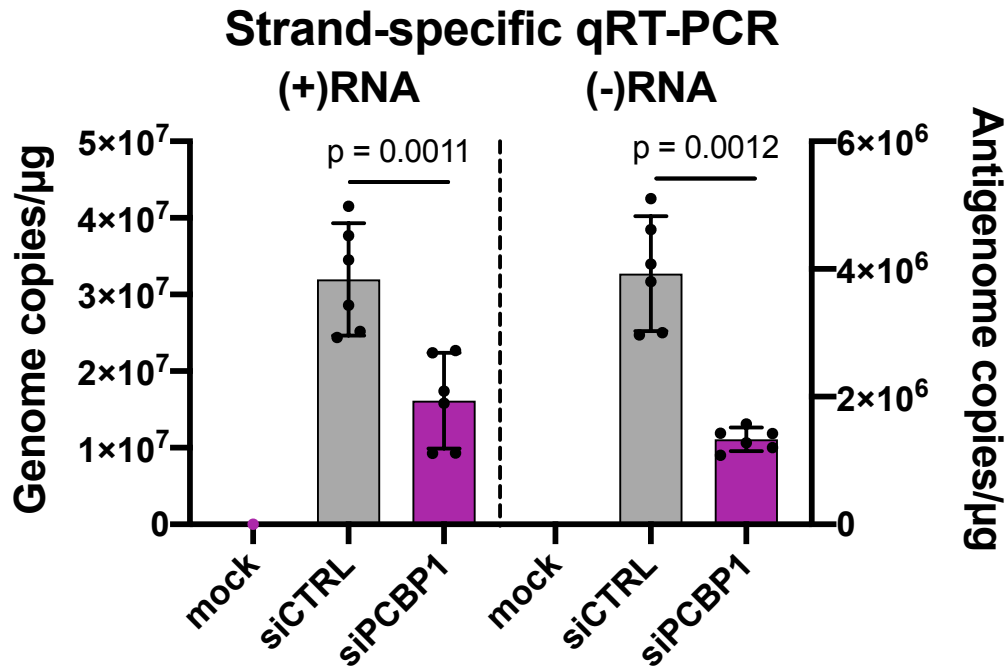

**Supplementary Figure 1. PCBP1 knockdown decreases both positive-sense and negative-sense viral RNA accumulation.** Two days post-siRNA transfection, Huh-7.5 cells were infected with JFH-1<sub>T</sub> (MOI = 0.05). Total RNA was harvested 3 days post-infection and analysed by strand-specific RT-qPCR. All data is representative of three independent replicates and error bars represent the standard deviation. P-values were calculated by paired t-test.

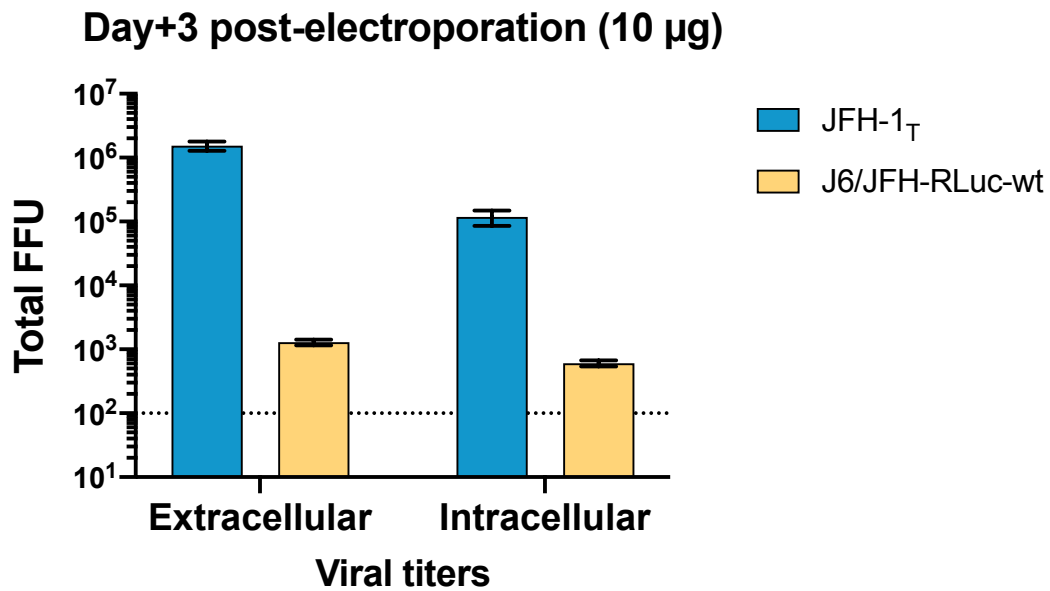

**Supplementary Figure 2. The J6/JFH FL Rluc WT can produce infectious viral particles, but much less efficiently than JFH-1<sub>T</sub>.** Three days post-electroporation of viral RNA, intracellular and extracellular viral titers were harvested and assayed by focus-forming unit assay. Data is representative of one independent replicate measured in duplicate. The limit of detection is indicated (dotted line).
